# Supplementary material for: Synthesis and Characterization of Hydroxyapatite- (HAP-) Clay Composites and Adsorption Studies on Methylene Blue for Water Treatment
Source: Hindawi journal article supplement (doi:10.1155/2021/3833737), 2021-09-17
Supplement: f1 [file 3833737.f1.docx]

**Data Supporting Information (SI)**

**SI 1 Adsorbent: HAP-HNT**

Table 1: Methylene Blue (MB) dye concentration = 5 mg/L, 20% HAP = HNT, Contact time = 1 hr

pH =5.5 – 7

| Mass of HAP (mg) | Mass of HNT (mg) | Absorbance 668 nm | Conc (mg/L) |
| --- | --- | --- | --- |
| 20 | 4 | 0.602 | 3.36 |
| 30 | 6 | 0.532 | 2.97 |
| 40 | 8 | 0.454 | 2.53 |
| 50 | 10 | 0.286 | 1.6 |
| 60 | 12 | 0.259 | 1.45 |
| 70 | 14 | 0.167 | 0.93 |
| 80 | 16 | 0.114 | 0.64 |
| 90 | 18 | 0.104 | 0.58 |
| 100 | 20 | 0.044 | 0.25 |

Table 2: 15% HAP = HNT, Contact time = 1 hr.

| Mass of HAP (mg) | Mass of HNT (mg) | Absorbance 668 nm | Conc (mg/L) |
| --- | --- | --- | --- |
| 20 | 3 | 0.818 | 4.014 |
| 30 | 4.5 | 0.769 | 3.773 |
| 40 | 6 | 0.645 | 3.165 |
| 50 | 7.5 | 0.511 | 2.507 |
| 60 | 9 | 0.449 | 2.203 |
| 70 | 10.5 | 0.447 | 2.193 |
| 80 | 12 | 0.334 | 1.639 |
| 90 | 13.5 | 0.415 | 2.036 |
| 100 | 15 | 0.197 | 0.967 |

Table 3: 10% HAP = HNT, Contact time = 1 hr.

| Mass of HAP (mg) | Mass of HNT (mg) | Absorbance at 668 nm | Conc (mg/L) |
| --- | --- | --- | --- |
| 20 | 2 | 0.894 | 4.049 |
| 30 | 3 | 0.866 | 3.922 |
| 40 | 4 | 0.779 | 3.528 |
| 50 | 5 | 0.734 | 3.324 |
| 60 | 6 | 0.691 | 3.13 |
| 70 | 7 | 0.69 | 3.125 |
| 80 | 8 | 0.601 | 2.722 |
| 90 | 9 | 0.579 | 2.622 |
| 100 | 10 | 0.523 | 2.367 |

**SI 2 Adsorbent: HAP-KAOLIN**

pH =5.5 – 7

Table 4: 20% HAP = Kaolin, Contact time = 1 hr.

| Mass of HAP (mg) | Mass of HNT (mg) | Absorbance at 668 nm | Conc (mg/L) |
| --- | --- | --- | --- |
| 20 | 4 | 0.881 | 4.39 |
| 30 | 6 | 0.831 | 4.13 |
| 40 | 8 | 0.786 | 3.907 |
| 50 | 10 | 0.798 | 3.966 |
| 60 | 12 | 0.655 | 3.255 |
| 70 | 14 | 0.7 | 3.479 |
| 80 | 16 | 0.644 | 3.201 |
| 90 | 18 | 0.659 | 3.275 |
| 100 | 20 | 0.62 | 3.082 |

Table 5: 15% HAP = Kaolin, Contact time = 1 hr.

| Mass of HAP (mg) | Mass of HNT (mg) | Absorbance at 668 nm | Conc (mg/L) |
| --- | --- | --- | --- |
| 20 | 3 | 0.691 | 4.065 |
| 30 | 4.5 | 0.72 | 4.235 |
| 40 | 6 | 0.697 | 4.1 |
| 50 | 7.5 | 0.984 | 4.2 |
| 60 | 9 | 0.98 | 4.188 |
| 70 | 10.5 | 0.825 | 3.526 |
| 80 | 12 | 0.903 | 3.859 |
| 90 | 13.5 | 0.88 | 3.761 |
| 100 | 15 | 0.84 | 3.589 |

Table 6: 10% HAP =Kaolin, Contact time = 1 hr.

| Mass of HAP (mg) | Mass of HNT (mg) | Absorbance at 668 nm | Conc (mg/L) |
| --- | --- | --- | --- |
| 20 | 2 | 1.041 | 4.566 |
| 30 | 3 | 0.987 | 4.329 |
| 40 | 4 | 1.034 | 4.535 |
| 50 | 5 | 0.869 | 3.811 |
| 60 | 6 | 0.84 | 3.684 |
| 70 | 7 | 0.907 | 3.978 |
| 80 | 8 | 0.864 | 3.789 |
| 90 | 9 | 0.85 | 3.728 |
| 100 | 10 | 0.726 | 3.184 |

**SI 3 Adsorbent: HAP-BENTONITE**

Table 7: 20% HAP =Bentonite, Contact time = 1 hr.

pH =5.5 – 7

| Mass of HAP (mg) | Mass of HNT (mg) | Absorbance at 668 nm | Conc (mg/L) |
| --- | --- | --- | --- |
| 20 | 4 | 0.034 | 0.159 |
| 30 | 6 | 0.017 | 0.08 |
| 40 | 8 | 0.026 | 0.122 |
| 50 | 10 | 0.013 | 0.061 |
| 60 | 12 | 0.02 | 0.094 |
| 70 | 14 | 0.028 | 0.131 |
| 80 | 16 | 0.05 | 0.234 |
| 90 | 18 | 0.02 | 0.094 |
| 100 | 20 | 0.012 | 0.056 |

Table 8: 25% HAP = Bentonite, Contact time = 1 hr.

| Mass of HAP (mg) | Mass of HNT (mg) | Absorbance at 668 nm | Conc (mg/L) |
| --- | --- | --- | --- |
| 20 | 3 | 0.062 | 0.29 |
| 30 | 4.5 | 0.015 | 0.07 |
| 40 | 6 | 0.017 | 0.08 |
| 50 | 7.5 | 0.018 | 0.084 |
| 60 | 9 | 0.071 | 0.332 |
| 70 | 10.5 | 0.054 | 0.253 |
| 80 | 12 | 0.048 | 0.225 |
| 90 | 13.5 | 0.121 | 0.566 |
| 100 | 15 | 0.161 | 0.286 |

Table 9: 10% HAP = Bentonite, Contact time = 1 hr.

| Mass of HAP (mg) | Mass of HNT (mg) | Absorbance at 668 nm | Conc (mg/L) |
| --- | --- | --- | --- |
| 20 | 2 | 0.225 | 1.05 |
| 30 | 3 | 0.087 | 0.405 |
| 40 | 4 | 0.096 | 0.447 |
| 50 | 5 | 0.086 | 0.4 |
| 60 | 6 | 0.064 | 0.3 |
| 70 | 7 | 0.080 | 0.372 |
| 80 | 8 | 0.048 | 0.224 |
| 90 | 9 | 0.107 | 0.5 |
| 100 | 10 | 0.047 | 0.219 |

**SI 4 Kinetic models Data**

Table 10: Methylene Blue (MB) dye Concentration, C = 5mg/L, 20% HAP =Bent; Mass of Bent = 4 mg; mass HAP = 20 mg

| Time/ mins | Conc at t (mg/L) | Removal Efficiency (%) | Adsorption Capacity (mg/g) | qe-qt | I(qe - qt)I | ln(qt - qe) | t/qt (min/mg/g) |
| --- | --- | --- | --- | --- | --- | --- | --- |
| 30 | 0.188 | 96.24 | 20.050 | 0.654 | 0.654 | -0.424 | 1.496 |
| 60 | 0.112 | 97.76 | 20.367 | 0.337 | 0.337 | -1.086 | 2.946 |
| 90 | 0.067 | 98.66 | 20.554 | 0.150 | 0.150 | -1.898 | 4.379 |
| 120 | 0.157 | 96.86 | 20.179 | 0.525 | 0.525 | -0.644 | 5.947 |
| 150 | 0.08 | 98.4 | 20.500 | 0.204 | 0.204 | -1.589 | 7.317 |
| 180 | 0.116 | 97.68 | 20.350 | 0.354 | 0.354 | -1.038 | 8.845 |
| 210 | 0.072 | 98.56 | 20.533 | 0.171 | 0.171 | -1.767 | 8.766 |
| 240 | 0.045 | 99.1 | 20.646 | 0.058 | 0.058 | -2.843 | 10.172 |
| 270 | 0.061 | 98.78 | 20.579 | 0.125 | 0.125 | -2.080 | 13.120 |
| 300 | 0.031 | 99.38 | 20.704 | 0.000 | 0.000 | -9.616 | 14.490 |

Table 11: MB dye Concentration, C = 5mg/L, 15 % HAP = Bentonite,

Combined mass = 34.5 mg (30 mg HAP+ mass Bentonite = 4.5 mg)

| Time/ mins | Conc at t (mg/L) | Removal Efficiency (%) | Adsorption Capacity (mg/g) | qe-qt | I(qe - qt)I | ln(qt - qe) | t/qt (min/mg/g) |
| --- | --- | --- | --- | --- | --- | --- | --- |
| 30 | 0.136 | 97.28 | 14.099 | 0.131 | 0.131 | -2.029 | 2.128 |
| 60 | 0.105 | 97.9 | 14.188 | 0.042 | 0.042 | -3.180 | 4.229 |
| 90 | 0.141 | 97.18 | 14.084 | 0.146 | 0.146 | -1.925 | 6.390 |
| 120 | 0.1 | 98 | 14.203 | 0.027 | 0.027 | -3.608 | 8.449 |
| 150 | 0.1 | 98 | 14.203 | 0.027 | 0.027 | -3.608 | 10.561 |
| 180 | 0.173 | 96.54 | 13.991 | 0.239 | 0.239 | -1.433 | 12.865 |
| 210 | 0.064 | 98.72 | 14.307 | -0.077 | 0.077 | -2.561 | 12.581 |
| 240 | 0.105 | 97.9 | 14.188 | 0.042 | 0.042 | -3.180 | 14.801 |
| 270 | 0.082 | 98.36 | 14.255 | -0.025 | 0.025 | -3.686 | 18.941 |
| 300 | 0.091 | 98.18 | 14.229 | 0.001 | 0.001 | #NUM! | 21.084 |

Table 12: MB dye Concentration, C = 5mg/L, 10 % HAP = Bentonite, Mass of HAP = 30 mg; mass Bentonite = 3 mg

| Time/ mins | Conc at t (mg/L) | Removal Efficiency (%) | Adsorption Capacity, qt (mg/g) | qe-qt | I(qe - qt)I | ln(qt - qe) | t/qt (min/mg/g) |
| --- | --- | --- | --- | --- | --- | --- | --- |
| 30 | 0.177 | 96.46 | 14.615 | -1.805 | 1.805 | 0.591 | 2.053 |
| 60 | 0.121 | 97.58 | 14.785 | -1.975 | 1.975 | 0.680 | 4.058 |
| 90 | 0.042 | 99.16 | 15.024 | -2.214 | 2.214 | 0.795 | 5.990 |
| 120 | 0.065 | 98.7 | 14.955 | -2.145 | 2.145 | 0.763 | 8.024 |
| 150 | 0.158 | 96.84 | 14.673 | -1.863 | 1.863 | 0.622 | 10.223 |
| 180 | 0.158 | 96.84 | 14.673 | -1.863 | 1.863 | 0.622 | 12.268 |
| 210 | 0.256 | 94.88 | 14.376 | -1.566 | 1.566 | 0.448 | 12.521 |
| 240 | 0.381 | 92.38 | 13.997 | -1.187 | 1.187 | 0.171 | 15.003 |
| 270 | 0.767 | 84.66 | 12.827 | -0.017 | 0.017 | -4.059 | 21.049 |
| 300 | 0.772 | 84.56 | 12.812 | -0.002 | -0.002 | -6.156 | 23.415 |

**SI 5 Isotherm models data**

Table 13: Mass of Bentonite = 4 mg; mass HAP = 20 mg

| Time / mins | Conc at t(mg/L) | Removal Efficiency (%) | Adsorption Capacity (mg/g) | Ct, Conc at t(mg/L) | Ct/qt (g/L) | Log (Ct) | Log(qt) |
| --- | --- | --- | --- | --- | --- | --- | --- |
| 30 | 0.188 | 96.24 | 20.050 | 0.188 | 0.009 | -0.726 | 1.302 |
| 60 | 0.112 | 97.76 | 20.367 | 0.112 | 0.005 | -0.951 | 1.309 |
| 90 | 0.067 | 98.66 | 20.554 | 0.067 | 0.003 | -1.174 | 1.313 |
| 120 | 0.157 | 96.86 | 20.179 | 0.157 | 0.008 | -0.804 | 1.305 |
| 150 | 0.08 | 98.4 | 20.500 | 0.080 | 0.004 | -1.097 | 1.312 |
| 180 | 0.116 | 97.68 | 20.350 | 0.116 | 0.006 | -0.936 | 1.309 |
| 210 | 0.072 | 98.56 | 20.533 | 0.072 | 0.004 | -1.143 | 1.312 |
| 240 | 0.045 | 99.1 | 20.646 | 0.045 | 0.002 | -1.347 | 1.315 |
| 270 | 0.061 | 98.78 | 20.579 | 0.061 | 0.003 | -1.215 | 1.313 |
| 300 | 0.031 | 99.38 | 20.704 | 0.031 | 0.001 | -1.509 | 1.316 |

Table 14: Combined mass = 30 mg + mass HAP = 4.5 mg

| Time/ mins | Conc at t(mg/L) | Removal Efficiency (%) | Adsorption Capacity(mg/g) | Ct, Conc at t(mg/L) | Ct/qt (g/L) | Log (Ct) | Log(qt) |
| --- | --- | --- | --- | --- | --- | --- | --- |
| 30 | 0.136 | 97.28 | 14.099 | 0.136 | 0.010 | -0.866 | 1.149 |
| 60 | 0.105 | 97.9 | 14.188 | 0.105 | 0.007 | -0.979 | 1.152 |
| 90 | 0.141 | 97.18 | 14.084 | 0.141 | 0.010 | -0.851 | 1.149 |
| 120 | 0.1 | 98 | 14.203 | 0.100 | 0.007 | -1.000 | 1.152 |
| 150 | 0.1 | 98 | 14.203 | 0.100 | 0.007 | -1.000 | 1.152 |
| 180 | 0.173 | 96.54 | 13.991 | 0.173 | 0.012 | -0.762 | 1.146 |
| 210 | 0.064 | 98.72 | 14.307 | 0.064 | 0.004 | -1.194 | 1.156 |
| 240 | 0.105 | 97.9 | 14.188 | 0.105 | 0.007 | -0.979 | 1.152 |
| 270 | 0.082 | 98.36 | 14.255 | 0.082 | 0.006 | -1.086 | 1.154 |
| 300 | 0.091 | 98.18 | 14.229 | 0.091 | 0.006 | -1.041 | 1.153 |

Table 15: Mass of HAP = 30 mg; mass of Bentonite = 3 mg

| Time/ mins | Conc at t(mg/L) | Removal Efficiency (%) | Adsorption Capacity, qt (mg/g) | Ct, Conc at t(mg/L) | Ct/qt (g/L) | Log (Ct) | Log(qt) |
| --- | --- | --- | --- | --- | --- | --- | --- |
| 30 | 0.177 | 96.46 | 14.615 | 0.177 | 0.012 | -0.752 | 1.165 |
| 60 | 0.121 | 97.58 | 14.785 | 0.121 | 0.008 | -0.917 | 1.170 |
| 90 | 0.042 | 99.16 | 15.024 | 0.042 | 0.003 | -1.377 | 1.177 |
| 120 | 0.065 | 98.7 | 14.955 | 0.065 | 0.004 | -1.187 | 1.175 |
| 150 | 0.158 | 96.84 | 14.673 | 0.158 | 0.011 | -0.801 | 1.167 |
| 180 | 0.158 | 96.84 | 14.673 | 0.158 | 0.011 | -0.801 | 1.167 |
| 210 | 0.256 | 94.88 | 14.376 | 0.256 | 0.018 | -0.592 | 1.158 |
| 240 | 0.381 | 92.38 | 13.997 | 0.381 | 0.027 | -0.419 | 1.146 |
| 270 | 0.767 | 84.66 | 12.827 | 0.767 | 0.060 | -0.115 | 1.108 |
| 300 | 0.772 | 84.56 | 12.812 | 0.772 | 0.060 | -0.112 | 1.108 |
